# Supplementary material
Source: PubMed Central journal article supplement (PMC5746054)
Supplement: NIHMS882440-supplement-Supplemental_tables_and_figures.pdf [file NIHMS882440-supplement-Supplemental_tables_and_figures.pdf]

**Table 1S. Baseline Demographic and Clinical Characteristics of Mexican-American Patients with Major Depression Who Received Desipramine or Fluoxetine**

| Characteristics <sup>a</sup>     | Group               |      |                    |      |
|----------------------------------|---------------------|------|--------------------|------|
|                                  | Desipramine (N=112) |      | Fluoxetine (N=120) |      |
|                                  | N                   | %    | N                  | %    |
| Gender                           |                     |      |                    |      |
| Female                           | 69                  | 61.6 | 84                 | 70.0 |
| Male                             | 43                  | 38.4 | 36                 | 30.0 |
| Education (years)                |                     |      |                    |      |
| Unknown                          | 5                   | 4.5  | 7                  | 5.8  |
| ≤5                               | 19                  | 17.0 | 21                 | 17.5 |
| 6-8                              | 31                  | 27.7 | 41                 | 34.2 |
| 9-12                             | 30                  | 26.8 | 24                 | 20.0 |
| 1-2 college                      | 12                  | 10.7 | 15                 | 12.5 |
| >2 college                       | 15                  | 13.4 | 12                 | 10.0 |
| Generation                       |                     |      |                    |      |
| Unknown                          | 6                   | 5.4  | 5                  | 4.2  |
| 1st generation                   | 100                 | 89.3 | 108                | 90.0 |
| 2nd generation                   | 5                   | 4.5  | 7                  | 5.8  |
| 4th generation                   | 1                   | 0.9  | 0                  | 0.0  |
| Language preference              |                     |      |                    |      |
| Unknown                          | 2                   | 1.8  | 2                  | 1.7  |
| Spanish only                     | 73                  | 65.2 | 79                 | 65.8 |
| Spanish better than English      | 29                  | 25.9 | 20                 | 16.7 |
| Spanish and English equally well | 4                   | 3.6  | 12                 | 10.0 |
| English better than Spanish      | 4                   | 3.6  | 7                  | 5.8  |
|                                  | Mean                | SD   | Mean               | SD   |
| Acculturation score              | 30.9                | 9.4  | 32.5               | 11.2 |
| Age (years)                      | 38.5                | 9.2  | 37.2               | 11.1 |
| HAM-D Score                      | 22.1                | 3.8  | 22.3               | 3.6  |
| HAM-A Score                      | 18.0                | 7.4  | 18.3               | 7.1  |
| BDI Score                        | 23.9                | 10.3 | 24.8               | 9.6  |
| CESD Score                       | 28.6                | 9.7  | 30.1               | 8.4  |
| GAS Score                        | 56.1                | 5.7  | 55.9               | 5.7  |

<sup>a</sup> No significant difference was found between treatment groups with all  $P \geq 0.156$ .

**Table 2S. Adverse Drug Reactions in Mexican-American Patients with Major Depression Who Received Desipramine or Fluoxetine**

| Adverse Drug Reactions              | Desipramine (N=112) |      | Fluoxetine (N=120) |      | Side Effects                         | Desipramine (N=112) |      | Fluoxetine (N=120) |      |
|-------------------------------------|---------------------|------|--------------------|------|--------------------------------------|---------------------|------|--------------------|------|
|                                     | N                   | %    | N                  | %    |                                      | N                   | %    | N                  | %    |
| General                             | 65                  | 58.0 | 60                 | 50.0 | Cardiovascular <sup>a</sup>          | 32                  | 28.6 | 17                 | 14.2 |
| Chills                              | 6                   | 5.4  | 4                  | 3.3  | Hypotension                          | 4                   | 3.6  | 1                  | 0.8  |
| Weight Gain                         | 4                   | 3.6  | 8                  | 6.7  | Hypertension                         | 6                   | 5.4  | 4                  | 3.3  |
| Weight Loss                         | 6                   | 5.4  | 7                  | 5.8  | Palpitations <sup>a</sup>            | 25                  | 22.3 | 13                 | 10.8 |
| Perspiration <sup>a</sup>           | 24                  | 21.4 | 14                 | 11.7 | Heart Block                          | 1                   | 0.9  | 0                  | 0.0  |
| Flushing                            | 8                   | 7.1  | 5                  | 4.2  | Anticholinergic <sup>b</sup>         | 74                  | 66.1 | 62                 | 51.7 |
| Nocturia                            | 2                   | 1.8  | 5                  | 4.2  | Dry Mouth                            | 46                  | 41.1 | 35                 | 29.2 |
| Drowsiness                          | 20                  | 17.9 | 25                 | 20.8 | Blurred Vision <sup>a</sup>          | 19                  | 17.0 | 9                  | 7.5  |
| Dizziness                           | 41                  | 36.6 | 32                 | 26.7 | Disturbance of Accommodation         | 1                   | 0.9  | 1                  | 0.8  |
| Chest Pain                          | 13                  | 11.6 | 8                  | 6.7  | Mydriasis                            | 0                   | 0.0  | 1                  | 0.8  |
| Psychiatric                         | 32                  | 28.6 | 35                 | 29.2 | Pressure like Sensation in Eyes      | 3                   | 2.7  | 2                  | 1.7  |
| Disorientation                      | 2                   | 1.8  | 4                  | 3.3  | Constipation                         | 30                  | 26.8 | 20                 | 16.7 |
| Delusions                           | 3                   | 2.7  | 0                  | 0.0  | Paralytic Ileus                      | 0                   | 0.0  | 2                  | 1.7  |
| Anxiety/ Irritability               | 15                  | 13.4 | 21                 | 17.5 | Urinary Retention                    | 1                   | 0.9  | 1                  | 0.8  |
| Restlessness                        | 10                  | 8.9  | 9                  | 7.5  | Delayed Micturation                  | 1                   | 0.9  | 1                  | 0.8  |
| Agitations                          | 8                   | 7.1  | 11                 | 9.2  | Urinary Frequency                    | 9                   | 8.0  | 7                  | 5.8  |
| Sleep Alterations                   | 14                  | 12.5 | 20                 | 16.7 | Knot Sensation in throat             | 9                   | 8.0  | 6                  | 5.0  |
| Bruxism                             | 0                   | 0.0  | 4                  | 3.3  | Orthostatic by pulse <sup>a</sup>    | 21                  | 18.8 | 11                 | 9.2  |
| Neurologic                          | 45                  | 40.2 | 43                 | 35.8 | Arrhythmias/ Bradycardia/Tachycardia | 9                   | 8.0  | 6                  | 5.0  |
| Numbness                            | 5                   | 4.5  | 2                  | 1.7  | Gastrointestinal                     | 45                  | 40.2 | 50                 | 41.7 |
| Tingling/ Parasthesias <sup>a</sup> | 15                  | 13.4 | 6                  | 5.0  | Change in Appetite                   | 15                  | 13.4 | 18                 | 15.0 |
| Incoordination                      | 1                   | 0.9  | 2                  | 1.7  | Nausea                               | 24                  | 21.4 | 25                 | 20.8 |
| Tremors                             | 8                   | 7.1  | 3                  | 2.5  | Vomiting                             | 6                   | 5.4  | 2                  | 1.7  |
| Seizures                            | 1                   | 0.9  | 0                  | 0.0  | Epigastric Distress/ Dyspepsia       | 19                  | 17.0 | 16                 | 13.3 |
| Tinnitus                            | 4                   | 3.6  | 6                  | 5.0  | Abdominal Cramps/ Bloating           | 9                   | 8.0  | 13                 | 10.8 |
| Headaches                           | 28                  | 25.0 | 35                 | 29.2 | Diarrhea                             | 3                   | 2.7  | 5                  | 4.2  |
| Myalgia                             | 10                  | 8.9  | 9                  | 7.5  | Metallic Taste in Mouth              | 5                   | 4.5  | 4                  | 3.3  |
| Allergic                            | 27                  | 24.1 | 23                 | 19.2 | Sexual (79 Males)                    | 8                   | 7.1  | 12                 | 10.0 |
| Skin Rash                           | 4                   | 3.6  | 6                  | 5.0  | Lack of Interest in Sex              | 3                   | 2.7  | 5                  | 4.2  |
| Urticaria                           | 7                   | 6.3  | 8                  | 6.7  | Impotence                            | 5                   | 4.5  | 7                  | 5.8  |
| Itching (Skin or Eyes)              | 19                  | 17.0 | 17                 | 14.2 | Premature Ejaculation                | 3                   | 2.7  | 6                  | 5.0  |
| Photosensitization                  | 1                   | 0.9  | 2                  | 1.7  | Difficulty Achieving Orgasm          | 0                   | 0.0  | 5                  | 4.2  |
| Edema                               | 1                   | 0.9  | 0                  | 0.0  | Sexual (153 Females)                 | 5                   | 4.5  | 9                  | 7.5  |
| Endocrine                           | 8                   | 7.1  | 8                  | 6.7  | Lack of Interest in Sex              | 4                   | 3.6  | 6                  | 5.0  |
| Change in Libido                    | 5                   | 4.5  | 6                  | 5.0  | Inability to Achieve Orgasm          | 0                   | 0.0  | 4                  | 3.3  |
| Impotence                           | 0                   | 0.0  | 4                  | 3.3  | Difficulty Achieving Orgasm          | 1                   | 0.9  | 5                  | 4.2  |
| Change in Sexual Function           | 3                   | 2.7  | 5                  | 4.2  | Any Side Effects                     | 90                  | 80.4 | 92                 | 76.7 |

<sup>a</sup> Significant difference between treatment groups ( $P < 0.05$ ). <sup>b</sup> Significant difference between treatment groups ( $P = 0.007$ ).

**Table 3S. Differences Between Completers Who Were Genotyped and Who Were Not Genotyped.**

| <b>Variable</b>                         | <b>Completer w/genotype<br/>(n=65)</b> | <b>Completer w/o genotype<br/>(n=101)</b> | <b>P</b>            |
|-----------------------------------------|----------------------------------------|-------------------------------------------|---------------------|
| <b>Gender (%)</b>                       |                                        |                                           |                     |
| Male/Female                             | 31/69                                  | 36/64                                     | 0.5168              |
| <b>Medication (%)</b>                   |                                        |                                           |                     |
| Fluoxetine/Desipramine                  | 54/46                                  | 56/44                                     | 0.7432              |
| <b>Age (mean±SD)</b>                    | 40.8±10.9                              | 37.4±9.6                                  | 0.0381 <sup>a</sup> |
| <b>Week 8 HAM-D score<br/>(mean±SD)</b> | 8.2±5.3                                | 8.5±5.5                                   | 0.6920              |

<sup>a</sup> Significant difference between completer groups ( $P < 0.05$  by Student-t test)

Figure 1S.

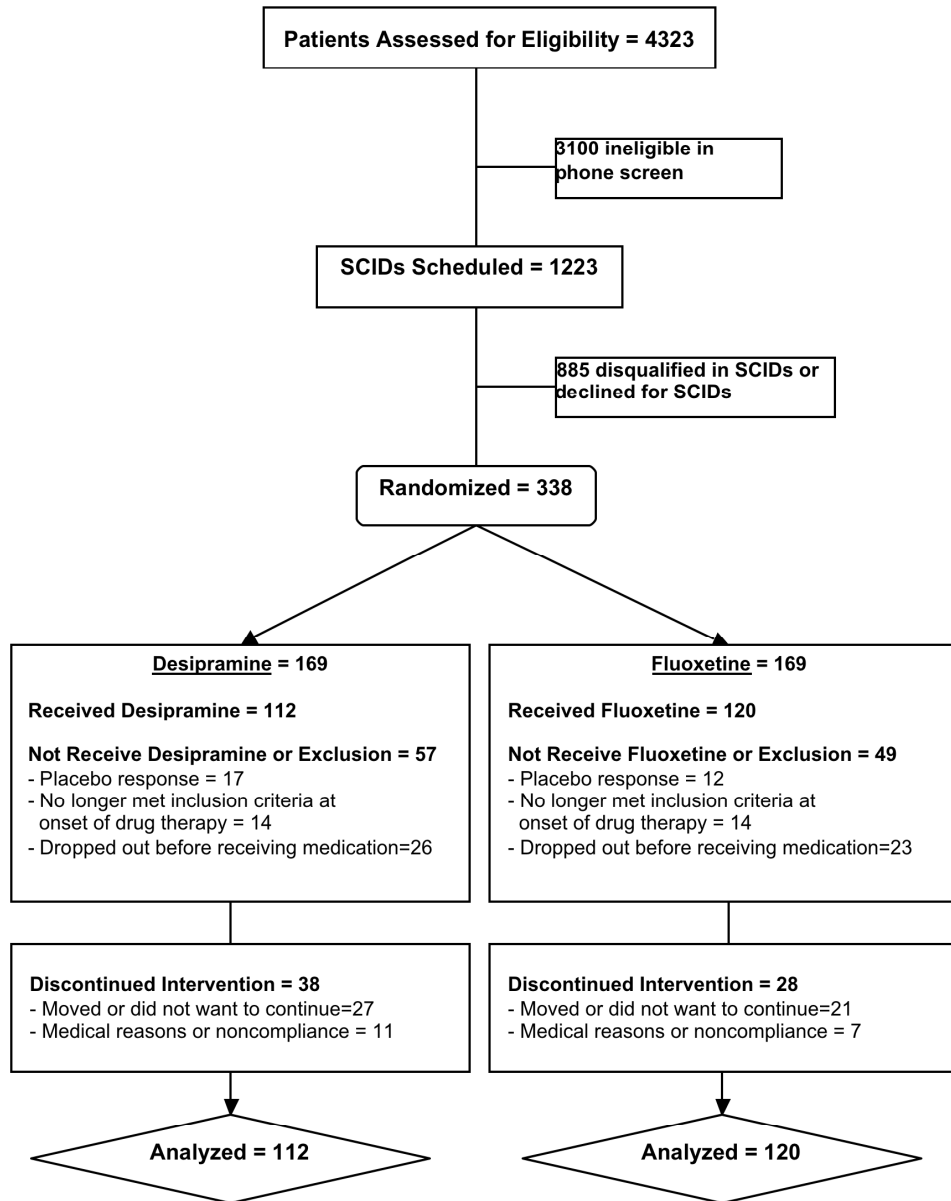

Figure 2S.

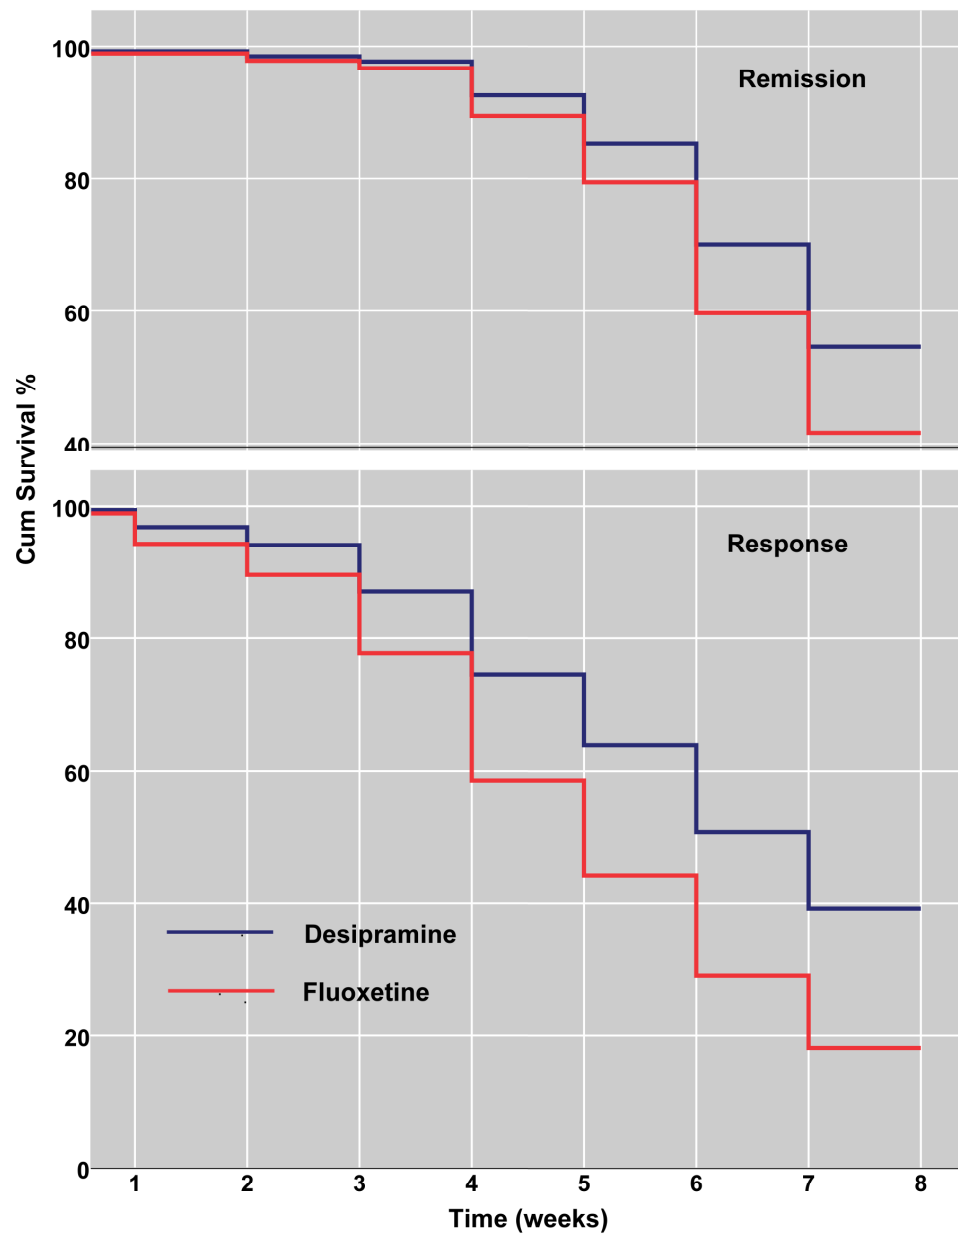

Figure 3S.

A

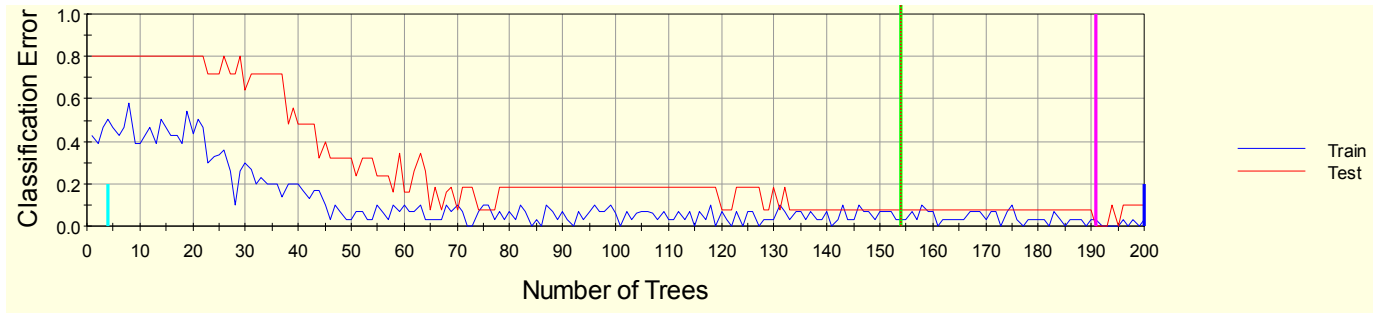

B

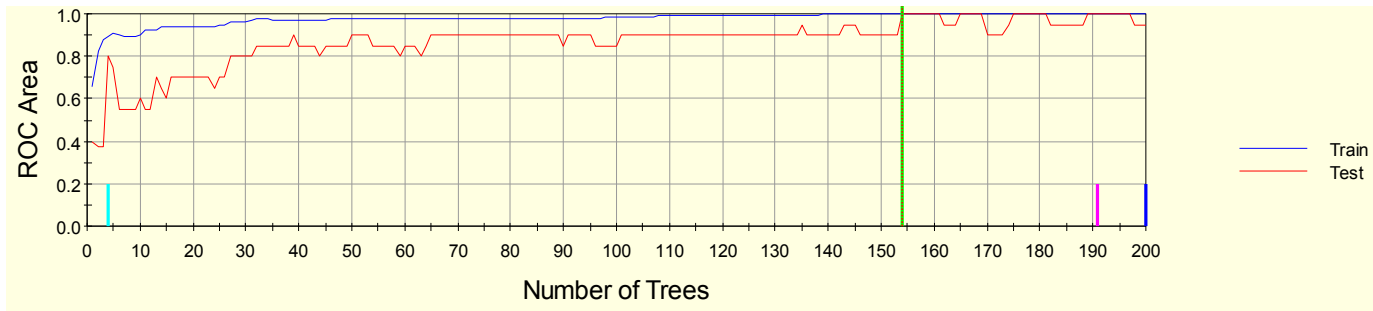

C

| Variable         | Score  |  |
|------------------|--------|--|
| EXM_RS1321744\$  | 100.00 |  |
| EXM_RS16867321\$ | 38.09  |  |
| EXM_RS8028182\$  | 33.65  |  |
| EXM2264428\$     | 31.54  |  |
| EXM433050\$      | 31.40  |  |
| EXM2258456\$     | 29.61  |  |
| EXM1127512\$     | 28.88  |  |
| EXM1125245\$     | 28.56  |  |
| EXM2266789\$     | 26.60  |  |
